# Supplementary material for: Delirium, Sedation and Analgesia in the Intensive Care Unit: A Multinational, Two-Part Survey among Intensivists
Source: PLOS journal article supplement (doi:10.1371/journal.pone.0110935), 2014-11-14
Supplement: S2 (10.1371/journal.pone.0110935.s002) [file journal.pone.0110935.s002]

# IMPROVE-ICU Part II

There are 32 questions in this survey

## Basic patient characteristics

### 1 Please enter your personal token \*

Please write your answer here:

### 2 Date of ICU admission \*

Please enter a date:

### 3 Please type of admission \*

Please choose **only one** of the following:

- ☐ Elective
- ☐ Emergency

### 4 What was the initial reason for ICU admission? \*

Please choose **only one** of the following:

- ☐ Surgical
- ☐ Medical
- ☐ Trauma

☐ Other

**5 What was the mainly affected organ system upon ICU admission? \***

Please choose **all** that apply:

- ☐ Central Nervous
- ☐ Cardiovascular
- ☐ Respiratory
- ☐ Gastrointestinal
- ☐ Genitourinary
- ☐ Trauma / Musculoskeletal

Other:

**6 Known disease of the central nervous system**

[Only answer this question if you answered 'Central Nervous' to question '5' ]

Please choose **all** that apply:

- ☐ Dementia
- ☐ Stroke
- ☐ Traumatic brain injury

Other:

**7 Dementia \***

[Only answer this question if you answered 'Dementia' to question '6' ]

Please choose **only one** of the following:

- ☐ Alzheimer's
- ☐ Parkinson's
- ☐ Other dementia

**8 Patient's age (years)**

\*

Please write your answer here:

**9 Patient's gender \***

Please choose **only one** of the following:

- ☐ Male
- ☐ Female

**10****Respiratory support. Currently the patient is / receives ...**

\*

Please choose **all** that apply:

- ☐ Not ventilated
- ☐ Non invasive ventilation (NIV)
- ☐ Invasive/mechanical ventilation
- ☐ Extracorporeal lung assist

**11 Duration (days) of mechanical / invasive ventilation**

[Only answer this question if you answered 'Invasive/mechanical ventilation' to question '10' ]

Please write your answer here:

**12 Duration (days) of extra corporal lung assist**

[Only answer this question if you answered 'Extracorporeal lung assist' to question '10' ]

Please write your answer here:

### 13 Devices

Please choose **all** that apply:

- ☐ Nasogastric tube
- ☐ Central venous line
- ☐ Intra-arterial line
- ☐ IABP
- ☐ Urinary catheter
- ☐ Dialysis catheter
- ☐ Epidural catheter
- ☐ ICP monitor

Other:

### 14 Drains (number)

Please write your answer here:

## Patients Score Values (last 24h)

Please type 999 for not applicable

**15 24 hours before day of study (January 24th, 00:00:00-23:59:59)**

**16 TISS 28**

Please write your answer here:

**17 APACHE II**

Please write your answer here:

**18 APACHE III**

Please write your answer here:

**19 SAPS**

Please write your answer here:

**20 SOFA**

Please write your answer here:

**21 Others (which)**

**Please write your answer here:**

## Patient's Pain Data

**22 What analgesics has the patient received during the 24 hours preceding the day of study? \***

Please choose all that apply:

- ☐ None used
- ☐ Fentanyl
- ☐ Sufentanil
- ☐ Remifentanyl
- ☐ Morphine
- ☐ Piritramide
- ☐ epidural

Other:

**24 hours before day of study (January 24th, 00:00:00-23:59:59)**

**23**  
**Patients highest pain score (score)**

|                 | VAS                  | NAS                  | BPS                  | Other                |
|-----------------|----------------------|----------------------|----------------------|----------------------|
| Morning shift   | <input type="text"/> | <input type="text"/> | <input type="text"/> | <input type="text"/> |
| Afternoon shift | <input type="text"/> | <input type="text"/> | <input type="text"/> | <input type="text"/> |
| Night shift     | <input type="text"/> | <input type="text"/> | <input type="text"/> | <input type="text"/> |

**24 hours before day of study (January 24th, 00:00:00-23:59:59)**

For each shift, please indicate only the highest score that has been documented and leave the others blank.

**24**  
**If you have used the column "other", please specify the name of the score**

Please write your answer here:

## Patient's Sedation Data

**25 What sedatives has the patient received during the 24 hours preceding the day of study?**  
\*

Please choose all that apply:

- ☐ None used
- ☐ Propofol
- ☐ Midazolam
- ☐ Lorazepam
- ☐ Clonidine
- ☐ Dexmedetomidine
- ☐ Ketamine
- ☐ Barbiturates

Other:

**24 hours before day of study (January 24th, 00:00:00-23:59:59)**

**26 Please name barbiturates**

[Only answer this question if you answered 'Barbiturates' to question '25' ]

Please write your answer here:

**27 Sedation scale (score)**

[Only answer this question if you have NOT answered 'None used' to question '25' ]

|                       | RASS                 | SAS                  | RSS                  | Other                |
|-----------------------|----------------------|----------------------|----------------------|----------------------|
| Morning shift (pts)   | <input type="text"/> | <input type="text"/> | <input type="text"/> | <input type="text"/> |
| Afternoon shift (pts) | <input type="text"/> | <input type="text"/> | <input type="text"/> | <input type="text"/> |
| Night shift (pts)     | <input type="text"/> | <input type="text"/> | <input type="text"/> | <input type="text"/> |

**24 hours before day of study (January 24th, 00:00:00-23:59:59)**

For each shift, please indicate only the highest score that has been documented and leave the others blank.



**28****If you have used the column "other", please specify the name of the score****Please write your answer here:**

## Patient's Delirium Data

**29**

**Was the patient delirious during the 24 hours preceding the day of study? \***

Please choose only one of the following:

- ☐ Yes
- ☐ No
- ☐ Delirium not monitored
- ☐ Evaluation not possible (e.g. RASS  $\leq$  -3, GCS 3)

**24 hours before day of study (January 24th, 00:00:00-23:59:59)**

**30**

**By whom was occurrence or non-occurrence of delirium detected? \***

[Only answer this question if you answered 'Yes' or 'No' to question '29' ]

Please choose only one of the following:

- ☐ Nurse
- ☐ Intensive Care MD
- ☐ Psychiatrist
- ☐ Psychologist
- ☐ Other

**31****Which score/method was used for detection?**

[Only answer this question if you answered 'No' or 'Yes' to question '29' ]

Please choose all that apply:

- ☐ None
- ☐ CAM (Confusion Assessment Method)
- ☐ CAM-ICU (The Confusion Assessment Method for the ICU)
- ☐ DDS (Delirium Detection Score)
- ☐ DRS-R98 (Delirium rating scale-revised-98)
- ☐ ICDSC (Intensive Care Delirium Screening Checklist)
- ☐ MDAS (Memorial Delirium Assessment Scale)
- ☐ Nu-DESC (Nursing Delirium Screening Scale)
- ☐ ICD-10 (International Classification of Diseases)
- ☐ DSM4 (diagnostical and statistical manual for mental disorders)

Other:

**32****Patients highest delirium score (score)**

[Only answer this question if you answered 'Yes' or 'No' to question '29' ]

Please write your answer(s) here:

Morning shift

Afternoon shift

Night shift

**24 hours before day of study (January 24th, 00:00:00-23:59:59)**

If score result is "positive" or "negative" (e.g. CAM-ICU), please type 100 for positive and 200 for negative

**2010-08-04**

**{FAX\_TO} Submit your survey.**

**Thank you for completing this survey.**
